# Supplementary material for: Effects of Stormwater and Snowmelt Runoff on ELISA-EQ Concentrations of PCDD/PCDF and Triclosan in an Urban River
Source: PLoS One. 2016 Mar 17;11(3):e0151756. doi: 10.1371/journal.pone.0151756 (PMC4795748; doi:10.1371/journal.pone.0151756)
Supplement: S1 File — (XLSX) [file pone.0151756.s001.xlsx]

## Sheet: results_dioxins
	Concentrations of dioxins
2013-07-19
	sampling point	pg/ml
	1R	132.791
	1Res	173.897
	2Res	165.737
	3Res	80.5963
	4Res	252.048
	5Res	611.623
	6Res	73.9957
	2ST	67.9357
	2R	76.6094
	3ST	398.971
	5ST	156.699
	7Res	38.7769
	6ST	33.6598												Average					SD
	3R	119.339													stormwater outflows	reservoirs	river		river	stormwater	reservoirs
	8Res	57.5705												I	145.52	181.217	236.82		180.918	148.784	175.99
	4R	365.32												II	87.3382	66.7142	60.3952		31.5997	52.848	33.056
	9Res	176.706												III	321.885	119.818	175.856		121.912	405.2	93.6888
	5R	490.042												IV	353.326	230.584	406.722		149.14	244.349	175.335
	7ST	70.3353												V	189.369	342.771	567.489		514.516	145.066	112.271
2013-09-03
	1R	94.8535
	1Res	52.0156
	2Res	118.703
	3Res	80.3814
	4Res	42.2359
	5Res	99.7899
	6Res	28.0709
	2ST	35.7918
	2R	34.6631
	3ST	158.805
	5ST	75.3918
	7Res	27.1132
	6ST	43.1478
	3R	21.0385
	8Res	57.2639
	4R	83.6662
	9Res	94.8535
	5R	67.7545
	7ST	123.554
2013-12-13
	1R	64.0225
	1Res	24.3326
	2Res	68.013
	3Res	309.924
	4Res	103.85
	5Res	41.3005
	6Res	32.4279
	2ST	68.7018
	2R	29.4674
	3ST	2.44538
	4ST	258.51
	5ST	1120.11
	7Res	188.199
	6ST	255.918
	3R	221.127
	8Res	132.264
	4R	262.448
	9Res	178.052
	5R	302.214
	7ST	225.629
2013-02-12
	1R	618.081
	1ST	694.025
	1Res	243.343
	2Res	193.976
	3Res	183.517
	4Res	139.801
	5Res	113.137
	6Res	30.9902
	2ST	179.856
	2R	218.91
	3ST	656.606
	4ST	171.882
	5ST	449.972
	7Res	265.106
	6ST	201.955
	3R	358.686
	8Res	252.079
	4R	475.616
	9Res	653.305
	5R	362.319
	7ST	118.984
2013-03-15
	1R	223.794
	1ST	115.869
	1Res	197.998
	2Res	162.268
	3Res	376.611
	4Res	376.611
	5Res	400.392
	6Res	323.153
	2ST	481.134
	2R	333.2
	3ST	154.984
	4ST	54.7266
	5ST	94.9598
	7Res	333.2
	6ST	268.923
	3R	496.093
	8Res	543.818
	4R	313.409
	9Res	370.889
	5R	1470.95
	7ST	154.984

## Sheet: results-triclosan
	Concentrations of triclosan
2013-07-19
	Sampling point	pg/ml
	1R	709.591
	1Res	283.228
	2Res	151.419															Average				SD
	3Res	552.364															stormwater outflows	reservoirs	river		river	stormwater	reservoirs
	4Res	575.911														I	264.023	511.388	486.789		214.264	125.12	274.386
	5Res	379.359														II	240.591	231.659	287.817		93.2948	110.398	118.293
	6Res	321.017														III	222.081	564.69	392.268		70.2017	123.471	807.513
	2ST	295.303														IV	373.042	302.147	410.042		56.738	170.769	173.487
	2R	283.228														V	444.109	499.283	486.261		194.144	199.301	226.712
	3ST	211.458
	5ST	194.519
	7Res	552.364
	6ST	467.415
	3R	448.304
	8Res	1077.24
	4R	709.591
	9Res	709.591
	5R	283.228
	7ST	151.419
2013-09-03
	1R	181.449
	1Res	148.978
	2Res	285.567
	3Res	177.906
	4Res	285.567
	5Res	495.995
	6Res	106.548
	2ST	164.413
	2R	334.359
	3ST	122.318
	5ST	234.463
	7Res	248.751
	6ST	407.235
	3R	216.682
	8Res	196.339
	4R	415.344
	9Res	134.991
	5R	291.253
	7ST	274.524
2013-12-13
	1R	305.878
	1Res	280.441
	2Res	225.723
	3Res	2457.54
	4Res	166.573
	5Res	21.1874
	6Res	34.1556
	2ST	170.228
	2R	189.742
	3ST	38.9065
	4ST	211.493
	5ST	206.952
	7Res	312.59
	6ST	405.596
	3R	380.027
	8Res	274.42
	4R	251.599
	9Res	1309.57
	5R	292.884
	7ST	299.31
2013-02-12
	1R	455.748
	1ST	693.795
	1Res	288.635
	2Res	189.602
	3Res	200.285
	4Res	86.4243
	5Res	253.982
	6Res	310.52
	2ST	304.898
	2R	346.497
	3ST	455.748
	4ST	227.611
	5ST	211.569
	7Res	372.769
	6ST	278.278
	3R	393.772
	8Res	706.587
	4R	372.769
	9Res	310.52
	5R	481.427
	7ST	439.395
2013-03-15
	1R	321.017
	1ST	739.841
	1Res	348.971
	2Res	467.415
	3Res	295.303
	4Res	307.892
	5Res	412.393
	6Res	363.848
	2ST	467.415
	2R	529.779
	3ST	283.228
	4ST	467.415
	5ST	202.812
	7Res	575.911
	6ST	652.75
	3R	804.266
	8Res	950.433
	4R	363.848
	9Res	771.381
	5R	412.393
	7ST	295.303

## Sheet: average
Sampling period	Dioxins	Triclosan		SD
I	186.46	439.82		164.749	242.695
II	70.48	248.56		37.9799	107.045
III	194.45	391.74		240.602	553.1
IV	313.44	351.47		201.194	153.45
V	345.14	477.79		291.814	201.586
